# Supplementary material
Source: PubMed Central journal article supplement (PMC2488228)

**A**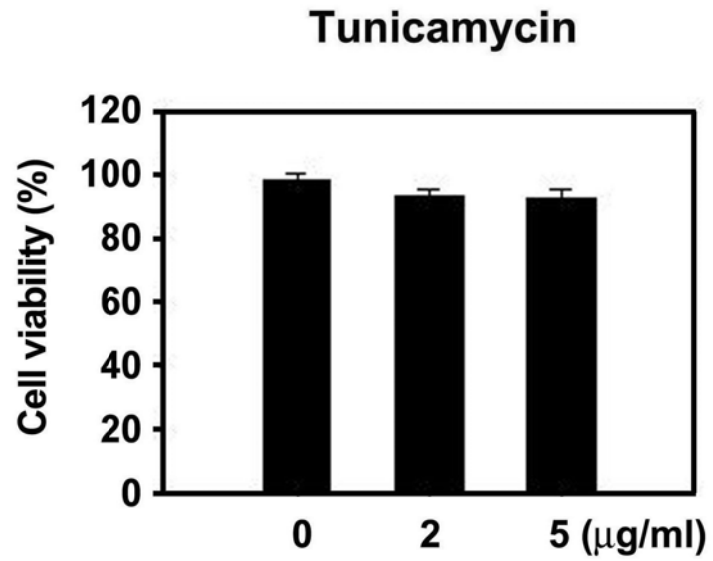**B**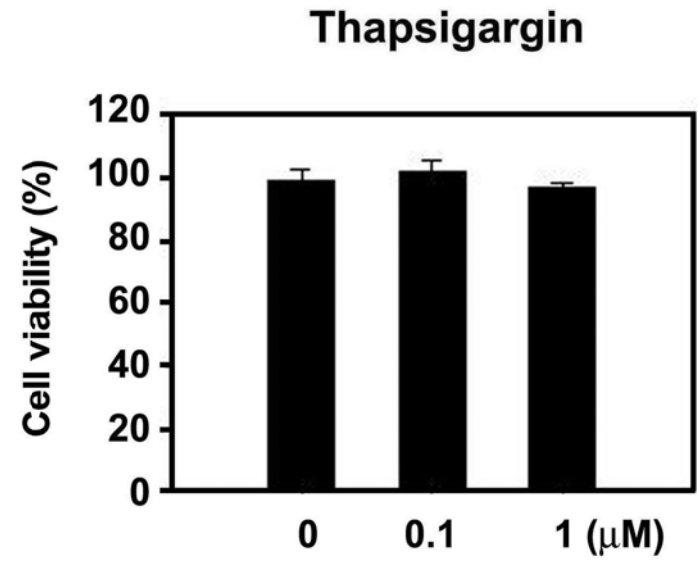**C**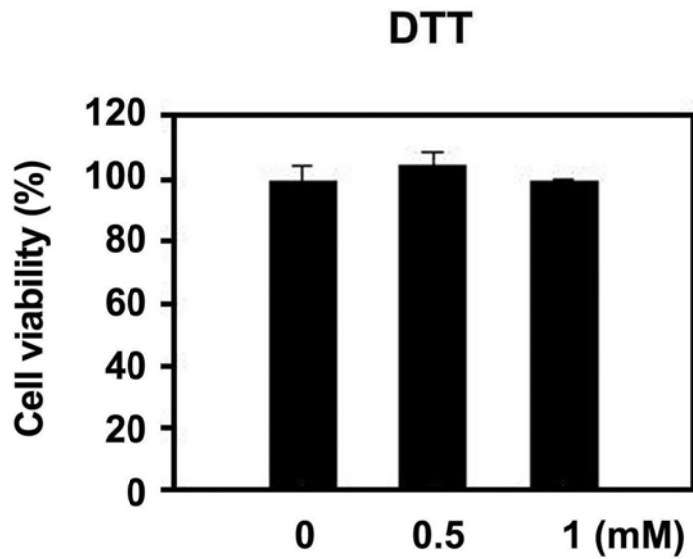**D**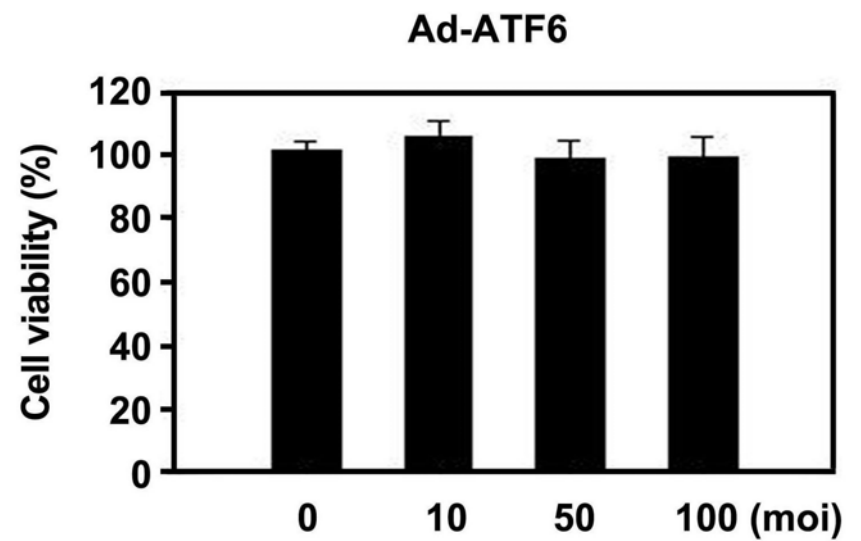**Fig. S 1**

Supplement: en.2008-0015_1.pdf [file en.2008-0015_1.pdf]
